# Supplementary material for: Loss of zinc transporters ZIP1 and ZIP3 augments platelet reactivity in response to thrombin and accelerates thrombus formation in vivo
Source: PubMed Central journal article supplement (PMC10285393; doi:10.3389/fimmu.2023.1197894), 2023-06-08
Supplement: DataSheet_1.pdf [file DataSheet_1.pdf]

## *Supplementary Material*

### **Loss of zinc transporters ZIP1 and ZIP3 augments platelet reactivity in response to thrombin and accelerates thrombus formation *in vivo***

Elgheznawy A, Öftering P, Englert M, Mott K, Kaiser F, Kusch C, Gbureck U, Bösl MR, Schulze H, Nieswandt B, Vögtle T, Hermanns HM\*

\* Correspondence: [Hermanns\\_H@ukw.de](mailto:Hermanns_H@ukw.de), [Voegtle\\_T@ukw.de](mailto:Voegtle_T@ukw.de)

#### **1 Supplementary Data**

No supplementary data

#### **2 Supplementary Figures and Tables**

##### **2.1 Supplementary Figures**

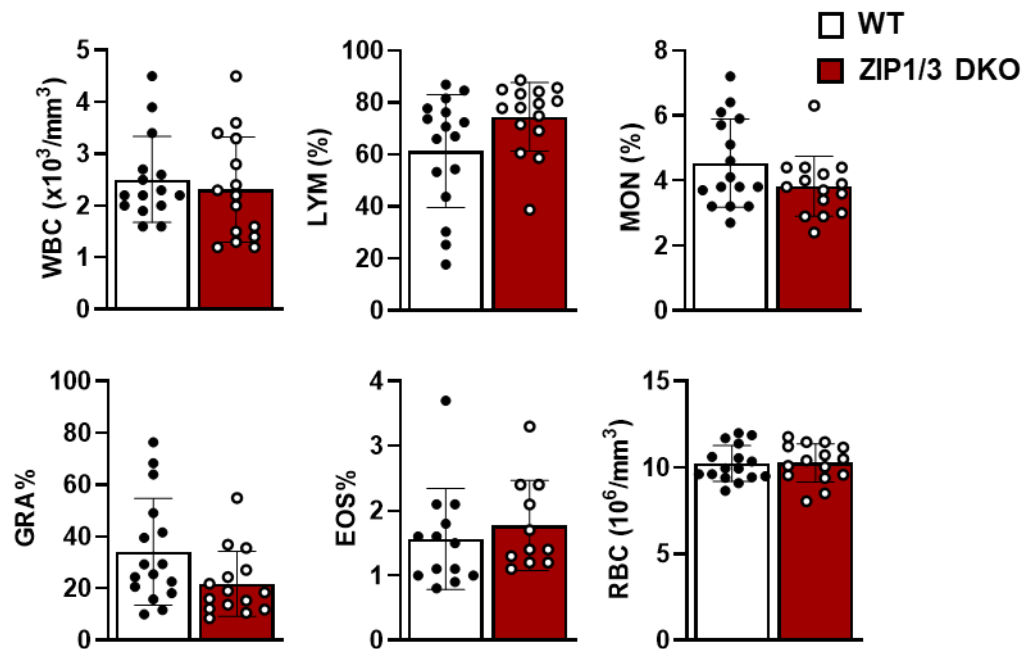

**Supplementary Figure 1. ZIP1/3 deficiency has no effect on white and red blood cell count.** Analyses of blood parameters were performed from EDTA blood using a ScilVET hemacytometer. n=15-16 (Students t-test).

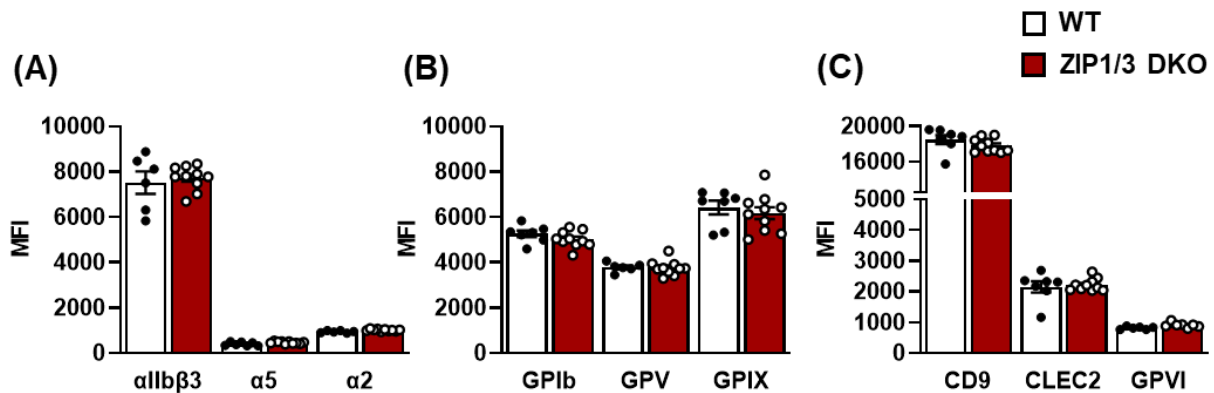

**Supplementary Figure 2. ZIP1/3 deficiency does not affect integrin or platelet glycoprotein cell surface levels.** Flow cytometric analysis of the cell surface expression of the indicated integrins (A), the GPIb-V-IX complex (B) and CD9, CLEC2, GPVI (C) using directly fluorescently-labelled specific antibodies in saturating amounts. n=6-10 (Students t-test).

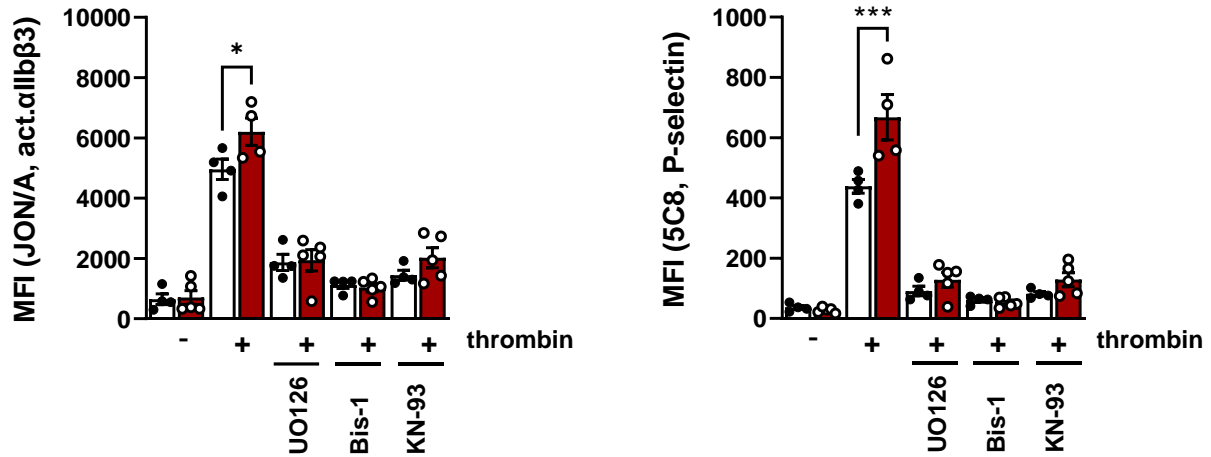

**Supplementary Figure 3: Influence of PKC, ERK1/2 and CaMKII inhibitors on thrombin-stimulated integrin activation and degranulation.** Platelets from WT and ZIP1/3 DKO mice were pre-incubated for 1h at RT with inhibitors against PKC (bisindolylmaleimide-1 (Bis-1); 10  $\mu$ M), MEK1/2 (UO126; 5 $\mu$ M) or CamKII (KN-93; 10  $\mu$ M), activated with a threshold dose of thrombin and stained with saturating amounts of PE-coupled JON/A detecting activated  $\alpha_{IIb}\beta_3$  integrin (left) and Dylight649-coupled anti-P-selectin (right); n=4-5 (two-way ANOVA + Bonferroni; \*P<0.05, \*\*\*P<0.001).
